# Supplementary material for: Profiling Y561-Dependent and -Independent Substrates of CSF-1R in Epithelial Cells
Source: PLoS One. 2010 Oct 26;5(10):e13587. doi: 10.1371/journal.pone.0013587 (PMC2964295; doi:10.1371/journal.pone.0013587)
Supplement: Table S2 — Tyrosine phosphorylated peptides identified in the comparison of CA-CSF-1R to CA-CSF-1R Y561F MCF-10A cells. (0.12 MB XLS) [file pone.0013587.s002.xls]

## Sheet: SuppTable 2
Supplemental Table 2. Tyrosine phosphorylated peptides identified in the comparison of CA-CSF-1R to CA-CSF-1R Y561F MCF-10A cells.
Protein Name	UniProt #	NCBI Site	Peptide Sequence	FC(CA-CSF-1R/Y561F)	Function
CSF-1R	P07333	Y561	K.IIESYEGNSY#TFIDPTQLPYNEK^WEFPR@.N	>16.44	Receptor tyrosine kinase
p120 CATENIN	O60716	Y904	K.SLDNNY#STPNER@.G	5.31	Adaptor/scaffold, Adhesion
p120 CATENIN	O60716	Y904	K.SLDNNY#STPNER.G	5.31	Adaptor/scaffold, Adhesion
Hrs	O14964	Y132	K.VVQDTY#QIMK^VEGHVFPEFK^.E	5.06	Adaptor/scaffold
Hrs	O14964	Y334	R.YLNR@NY#WEK^.K	4.49	Adaptor/scaffold
TJAP1	Q5JTD0	Y352	R.NSPLPNCTY#ATR@.Q	4.31	Adhesion
ZDHHC7	Q9NXF8	Y130	K.EYMESLQLK^PGEVIY#K^.C	4.05	Unknown function
ZDHHC7	Q9NXF8	Y130	K.EYMESLQLK^PGEVIY#K^.C	3.99	Unknown function
ZDHHC7	Q9NXF8	Y130	K.EYMESLQLKPGEVIY#KCPK.C	3.98	Unknown function
Hrs	O14964	Y216	R.VCEPCY#EQLNR.K	3.51	Adaptor/scaffold
Hrs	O14964	Y216	R.VCEPCY#EQLNR@.K	3.5	Adaptor/scaffold
Ack	Q07912	Y518	K.KPTY#DPVSEDQDPLSSDFKR.L	3.45	Protein kinase, tyrosine (non-receptor)
Hrs	O14964	Y132	K.YKVVQDT#YQIMK.V	3.12	Adaptor/scaffold
Hrs	O14964	Y132	K.YK^VVQDTY#QIMK^.V	3.12	Adaptor/scaffold
Hrs	O14964	Y132	K.VVQDTY#QIMK^.V	3.11	Adaptor/scaffold
Hrs	O14964	Y132	K.VVQDTY#QIMK.V	3.11	Adaptor/scaffold
Intersectin 2	Q9NZM3	Y552	K.LIY#LVPEK^.Q	2.73	Adaptor/scaffold
Intersectin 2	Q9NZM3	Y552	K.LIY#LVPEK.Q	2.73	Adaptor/scaffold
Hrs	O14964	Y132	K.YK^VVQDTY#QIMK^.V	2.63	Adaptor/scaffold
Hrs	O14964	Y132	K.YKVVQDTY#QIMK.V	2.63	Adaptor/scaffold
ATP1A1	P05023	Y260	R.GIVVY#TGDR.T	2.62	Hydrolase
ATP1A1	P05023	Y260	R.GIVVY#TGDR@.T	2.62	Hydrolase
KIAA0323	O15037	Y456	R.HIVIDGSNVAMVHGLQHY#FSSR.G	2.22	Unknown function
Beta-adaptin	P63010	Y276	K.DSDY#YNMLLK^.K	2.12	Vesicle protein
Stat 5A	P42229	Y694	K.AVDGY#VKPQIK.Q	2.11	Transcription factor
Stat 5A	P42229	Y694	K.AVDGY#VK^PQIK^.Q	2.11	Transcription factor
EphA2	P29317	Y575	R.QSPEDVY#FSK^.S	2.11	Receptor tyrosine kinase
EphB4	P54760	T587, Y595	K.HGQYLIGHGT#KVYIDPFTY#EDPNEAVR.E	2.09	Receptor tyrosine kinase
FLJ20625	Q9NWT0	Y40	K.ALNGAEPNY#HSLPSAR@.T	2.06	Unknown function
KIAA0323	O15037	Y456	R.HIVIDGSNVAMVHGLQHY#FSSR@.G	1.98	Unknown function
KIAA0323	O15037	Y456	R.HIVIDGSNVAMVHGLQHY#FSSR.G	1.98	Unknown function
RAN	P62826	Y146	K.NLQY#YDISAK.S	1.81	Nuclear receptor co-regulator, G protein
PLEKHA6	Q9Y2H5	Y492	R.SEDIY#ADPAAYVMR@.R	1.79	Lipid binding protein
PLEKHA6	Q9Y2H5	Y492	R.SEDIY#ADPAAYVMR.R	1.79	Lipid binding protein
EphB4	P54760	Y774	R.FLEENSSDPTY#TSSLGGKIPIR.W	1.75	Receptor tyrosine kinase
EphB4	P54760	Y774	R.FLEENSSDPTY#TSSLGGK^IPIR@.W	1.75	Receptor tyrosine kinase
KIAA0323	O15037	Y456	R.HIVIDGSNVAM*VHGLQHY#FSSR@.G	1.7	Unknown function
SPG20	Q8N0X7	Y46	K.GLNTDELGQKEEAKNYY#K.Q	1.66	Unknown function
KIAA1217	Q5T5P2	Y393	R.NEGFY#ADPYLYHEGR@.M	1.6	Unknown function
KIAA1217	Q5T5P2	Y393	R.NEGFY#ADPYLYHEGR.M	1.6	Unknown function
Integrin beta-4	P16144	Y1510	R.SEHSHSTTLPR@DY#STLTSVSSHDSR@.L	1.59	Adhesion, Receptor
p120 catenin	O60716	Y228	R.HYEDGYPGGSDNY#GSLSR@.V	1.53	Adaptor/scaffold, Adhesion
p120 catenin	O60716	Y228	R.HYEDGYPGGSDNY#GSLSR.V	1.53	Adaptor/scaffold, Adhesion
Erbin	Q96RT1	Y1104	R.R@AQIPEGDY#LSYR@.E	1.52	Adhesion
Erbin	Q96RT1	Y1104	R.R@AQIPEGDY#LSYR@.E	1.51	Adhesion
Erbin	Q96RT1	Y1104	R.AQIPEGDY#LSYR@.E	1.51	Adhesion
Erbin	Q96RT1	Y1104	R.AQIPEGDY#LSYR.E	1.51	Adhesion
RPS13	P62277	Y37	K.LTSDDVKEQIY#K.L	1.49	Translation
HIPK3	Q9H422	Y359	K.TVCSTY#LQSR@.Y	1.43	Protein kinase, Ser/Thr (non-receptor)
PIK3R3	Q92569	Y373	R.VQAEDLLY#GKPDGAFLIR.E	1.43	Kinase, lipid
Plakophilin 4	Q99569	Y1168	K.STTNY#VDFYSTK^.R	1.42	Adhesion
Plakophilin 4	Q99569	Y1168	K.STTNY#VDFYSTK.R	1.42	Adhesion
FRK	P42685	Y46	R.HGHY#FVALFDYQAR@.T	1.41	Protein kinase, tyrosine (non-receptor)
FRK	P42685	Y46	R.HGHY#FVALFDYQAR.T	1.41	Protein kinase, tyrosine (non-receptor)
p130Cas	P56945	Y234	R.VGQGYVYEAAQPEQDEY#DIPR.H	1.37	Adaptor/scaffold
CSF-1R	P07333	Y873	K.DGY#QMAQPAFAPK^.N	1.3	Receptor tyrosine kinase
CSF-1R	P07333	Y873	K.DGY#QMAQPAFAPK.N	1.3	Receptor tyrosine kinase
Transferrin receptor	P02786	S19	R.SAFSNLFGGEPLS#YTR@.F	1.28	Cell surface, Receptor, misc.
Cytokeratin 7	P08729	S37, Y39	R.LSSARPGGLGSSS#LY#GLGASRPR.V	1.27	Cytoskeletal protein
SHP-2	Q06124	Y62	K.IQNTGDY#YDLYGGEK^.F	1.24	Protein phosphatase, tyrosine (non-receptor)
EphB4	P54760	Y574	R.EAEYS#DK^HGQYLIGHGTK^.V	1.24	Receptor tyrosine kinase
Cytokeratin 7	P08729	Y39	R.LSSARPGGLGSSSLY#GLGASRPR.V	1.23	Cytoskeletal protein
LDH-B	P07195	Y239	K.MVVESAY#EVIK.L	1.23	Enzyme, cellular metabolism
CSF-1R	P07333	Y873	K.LVK^DGY#QMAQPAFAPK^.N	1.21	Receptor tyrosine kinase
HGF-R	P08581	Y1234	R.DMYDKEY#YSVHNK.T	1.21	Receptor tyrosine kinase
HGF-R	P08581	Y1234	R.DMYDK^EY#YSVHNK^.T	1.21	Receptor tyrosine kinase
GSTP1	P09211	Y7	-.PPYTVVY#FPVR@.G	1.19	Transferase
GSTP1	P09211	Y7	-.PPYTVVY#FPVR.G	1.19	Transferase
DYRK1B	Q9Y463	Y273	R.IYQY#IQSR@.F	1.19	Protein kinase, dual-specificity
DYRK1B	Q9Y463	Y273	R.IYQY#IQSR.F	1.19	Protein kinase, dual-specificity
Integrin beta-4	P16144	Y1207	K.VCAYGAQGEGPY#SSLVSCR.T	1.18	Adhesion, Receptor
PRP4	Q13523	Y849	K.LCDFGSASHVADNDITPY#LVSR@.F	1.17	Protein kinase, Ser/Thr (non-receptor)
PRP4	Q13523	Y849	K.LCDFGSASHVADNDITPY#LVSR.F	1.17	Protein kinase, Ser/Thr (non-receptor)
PRP4	Q13523	Y849	K.LCDFGSASHVADNDITPY#LVSR.F	1.17	Protein kinase, Ser/Thr (non-receptor)
KIRREL	Q96J84	Y724	R.TPYEAY#DPIGK^.Y	1.17	Adhesion
GRF-1	Q9NRY4	Y1105	R.NEEENIY#SVPHDSTQGK^.I	1.17	Transcription factor
GRF-1	Q9NRY4	Y1105	R.NEEENIY#SVPHDSTQGK.I	1.17	Transcription factor
EphA2	P29317	Y588, Y594	K.SEQLKPLKTY#VDPHTY#EDPNQAVLK.F	1.16	Receptor tyrosine kinase
EphA2	P29317	Y772	R.VLEDDPEATY#TTSGGKIPIR.W	1.16	Receptor tyrosine kinase
EphA2	P29317	Y772	R.VLEDDPEATY#TTSGGK^IPIR@.W	1.16	Receptor tyrosine kinase
					continued on next page
Supplemental Table 2 (continued). Tyrosine phosphorylated peptides identified in the comparison of CA-CSF-1R to CA-CSF-1R Y561F MCF-10A cells.
Protein Name	UniProt #	NCBI Site	Peptide Sequence	FC(CA-CSF-1R/Y561F)	Function
PTTG1IP	P53801	Y174	K.YGLFK^EENPY#AR@.F	1.15	Unknown function
Cytokeratin 7	P08729	S37, Y39	R.LSSARPGGLGSSS#LY#GLGASRPR.V	1.14	Cytoskeletal protein
COFILIN	P23528	Y139	K.HELQANCY#EEVKDR.C	1.14	Cytoskeletal protein
ACK	Q07912	Y857	K.KVSSTHY#YLLPERPSYLER.Y	1.13	Protein kinase, tyrosine (non-receptor)
PTPRA	P18433	Y798	K.VVQEYIDAFSDY#ANFK^.-	1.13	Receptor protein phosphatase, tyrosine
PTPRA	P18433	Y798	K.VVQEYIDAFSDY#ANFK.-	1.13	Receptor protein phosphatase, tyrosine
FLJ20625	Q9NWT0	Y140	R.IAAYAY#SALSQIR@.V	1.13	Unknown function
PTTG1IP	P53801	Y174	K.YGLFKEENPY#AR.F	1.11	Unknown function
PTTG1IP	P53801	Y174	K.YGLFK^EENPY#AR@.F	1.11	Unknown function
Calmodulin	P62158	Y99	R.VFDKDGNGY#ISAAELR.H	1.11	Calcium-binding protein
Calmodulin	P62158	Y99	R.VFDK^DGNGY#ISAAELR@.H	1.11	Calcium-binding protein
SHB	Q15464	Y268	K.AGKGESAGY#MEPYEAQR.I	1.09	Adaptor/scaffold
SHB	Q15464	Y268	K.AGK^GESAGY#MEPYEAQR@.I	1.09	Adaptor/scaffold
PRP4	Q13523	Y849	K.LCDFGSASHVADNDITPYLVS#R.F	1.09	Protein kinase, Ser/Thr (non-receptor)
PRP4	Q13523	Y849	K.LCDFGSASHVADNDITPY#LVSR@.F	1.09	Protein kinase, Ser/Thr (non-receptor)
PRP4	Q13523	Y849	K.LCDFGSASHVADNDITPY#LVSR.F	1.09	Protein kinase, Ser/Thr (non-receptor)
PRP4	Q13523	Y849	K.LCDFGSASHVADNDITPY#LVSR@.F	1.09	Protein kinase, Ser/Thr (non-receptor)
EphA2	P29317	Y772	R.VLEDDPEATY#TTSGGKIPIR.W	1.09	Receptor tyrosine kinase
EphA2	P29317	Y772	R.VLEDDPEATY#TTSGGK.I	1.09	Receptor tyrosine kinase
EphA2	P29317	Y588	K.SEQLKPLKTY#VDPHTYEDPNQAVLK.F	1.07	Receptor tyrosine kinase
HIPK2	Q9H2X6	Y361	K.AVCSTY#LQSR@.Y	1.05	Protein kinase, Ser/Thr (non-receptor)
HIPK2	Q9H2X6	Y361	K.AVCSTY#LQSR.Y	1.05	Protein kinase, Ser/Thr (non-receptor)
p38-alpha	Q16539-2	Y182	R.HTDDEMTGY#VATR@.W	1.03	Protein kinase, Ser/Thr (non-receptor)
p38-alpha	Q16539-2	Y182	R.HTDDEMTGY#VATR.W	1.03	Protein kinase, Ser/Thr (non-receptor)
GUK1	Q16774	Y52	R.NPRPGEENGKDY#YFVTR.E	1.03	Kinase (non-protein)
GSK3B	P49841	Y216	R.GEPNVSY#ICSR@.Y	1.03	Protein kinase, Ser/Thr (non-receptor)
GSK3B	P49841	Y216	R.GEPNVSY#ICSR.Y	1.03	Protein kinase, Ser/Thr (non-receptor)
GSK3B	P49841	Y216	R.GEPNVSY#ICSR@.Y	1.03	Protein kinase, Ser/Thr (non-receptor)
GSK3B	P49841	Y216	R.GEPNVSY#ICSR@.Y	1.03	Protein kinase, Ser/Thr (non-receptor)
GSK3B	P49841	Y216	R.GEPNVSY#ICSR.Y	1.03	Protein kinase, Ser/Thr (non-receptor)
GSK3B	P49841	Y216	R.GEPNVSY#ICSR.Y	1.03	Protein kinase, Ser/Thr (non-receptor)
ACK	Q07912	Y857	K.VSSTHY#YLLPER@PSYLER@.Y	1.01	Protein kinase, tyrosine (non-receptor)
ACK	Q07912	Y857	K.VSSTHY#YLLPERPSYLER.Y	1.01	Protein kinase, tyrosine (non-receptor)
Paxillin	P49023-2	Y118	R.VGEEEHVY#SFPNKQK.S	1.01	Adhesion, Adaptor/scaffold
CSF-1R	P07333	Y809	R.DIMNDSNY#IVK^.G	1.01	Receptor tyrosine kinase
CSF-1R	P07333	Y809	R.DIMNDSNY#IVK.G	1.01	Receptor tyrosine kinase
Fak1	Q05397	Y576	R.YMEDSTY#YK^.A	1	Protein kinase, tyrosine (non-receptor)
Fak1	Q05397	Y576	R.YMEDSTY#YK.A	1	Protein kinase, tyrosine (non-receptor)
Fak1	Q05397	Y576	R.YMEDSTY#YK^.A	1	Protein kinase, tyrosine (non-receptor)
Fak1	Q05397	Y576	R.YMEDSTY#YK.A	1	Protein kinase, tyrosine (non-receptor)
LDLR	P01130	Y845	K.TTEDEVHICHNQDGY#SYPSR@.Q	1	Receptor, misc.
LDLR	P01130	Y845	K.TTEDEVHICHNQDGY#SYPSR.Q	1	Receptor, misc.
Yes	P07947	Y221	R.KLDNGGY#YITTR.A	0.99	Protein kinase, tyrosine (non-receptor)
Paxillin	P49023-2	Y118	R.VGEEEHVY#SFPNK^.Q	0.98	Adhesion, Adaptor/scaffold
Paxillin	P49023-2	Y118	R.VGEEEHVY#SFPNK.Q	0.98	Adhesion, Adaptor/scaffold
p130CAS	P56945	Y327	K.DVPDGPLLREETY#DVPPAFAK.A	0.98	Adaptor/scaffold
Paxillin	P49023-2	Y88	R.FIHQQPQSSSPVY#GSSAK^.T	0.97	Adhesion, Adaptor/scaffold
Paxillin	P49023-2	Y88	R.FIHQQPQSSSPVY#GSSAK.T	0.97	Adhesion, Adaptor/scaffold
ZO-2	Q9UDY2	Y1118	R.IEIAQKHPDIY#AVPIK.T	0.96	Adaptor/scaffold
N-WASP	O00401	Y256	K.VIY#DFIEK^.T	0.96	Adaptor/scaffold
N-WASP	O00401	Y256	K.VIY#DFIEK.T	0.96	Adaptor/scaffold
D-Prohibitin	Q99623	Y121	R.VLSRPNAQELPSMY#QR.L	0.95	Nuclear receptor co-regulator
SHB	Q15464	Y246	K.DKVTIADDY#SDPFDAKNDLK.S	0.93	Adaptor/scaffold
p130CAS	P56945	Y267	R.GLLPSQYGQEVY#DTPPMAVK.G	0.93	Adaptor/scaffold
Calmodulin	P62158	Y99	R.VFDKDGNGY#ISAAELR.H	0.93	Calcium-binding protein
Calmodulin	P62158	Y99	R.VFDK^DGNGY#ISAAELR@.H	0.93	Calcium-binding protein
PLEKHA5	Q9HAU0	Y134	K.ER@PISMINEASNYNVTSDY#AVHPMSPVGR@.T	0.92	Lipid binding protein
MGC14839	Q96A22	Y78	R.SPGLMSEDSNLHY#ADIQVCSRPHAR.E	0.92	Unknown function
Cytokeratin 5	P13647	Y60	R.VSLAGACGVGGY#GSR@.S	0.91	Cytoskeletal protein
Cytokeratin 5	P13647	Y60	R.VSLAGACGVGGY#GSR.S	0.91	Cytoskeletal protein
p130CAS	P56945	Y249	R.HLLAPGPQDIY#DVPPVR.G	0.91	Adaptor/scaffold
ACLY	P53396	Y1073	R.SMGFIGHY#LDQK^.R	0.9	Enzyme, misc.
ACLY	P53396	Y1073	R.SMGFIGHY#LDQK.R	0.9	Enzyme, misc.
eEF1A-2	Q05639	Y141	R.EHALLAY#TLGVK.Q	0.88	Translation
IRS2	Q9Y4H2	Y823	K.APYTCGGDSDQY#VLMSSPVGR.I	0.87	Adaptor/scaffold
VCL	P18206	Y821	K.SFLDSGY#R@.I	0.86	Cytoskeletal protein, Adhesion
BCS1	Q9Y276	Y181	K.TVMYTAVGSEWRPFGY#PR.R	0.86	Chaperone
BCS1	Q9Y276	Y181	K.TVMYTAVGSEWR@PFGY#PR@.R	0.86	Chaperone
ADK2	P54819	Y200	R.LQAYHTQTTPLIEYY#R@.K	0.86	Kinase (non-protein)
ADK2	P54819	Y199	R.LQAYHTQTTPLIEY#YR.K	0.86	Kinase (non-protein)
KIRREL	Q96J84	Y605	R.EEYEMKDPTNGY#YNVR.A	0.85	Adhesion
TALIN-1	Q9Y490	Y70	K.ALDY#YMLR.N	0.84	Cytoskeletal protein
Insulin Receptor	P06213	Y1189	R.DIYETDY#YR@.K	0.84	Receptor tyrosine kinase
Insulin Receptor	P06213	Y1189	R.DIYETDY#YR.K	0.84	Receptor tyrosine kinase
RPP0	P05388	Y24	K.IIQLLDDY#PK^.C	0.83	Translation
RPP0	P05388	Y24	K.IIQLLDDY#PK.C	0.83	Translation
Paxillin	P49023-2	Y118	R.VGEEEHVY#SFPNK^.Q	0.81	Adhesion, Adaptor/scaffold
Paxillin	P49023-2	Y118	R.VGEEEHVY#SFPNK.Q	0.81	Adhesion, Adaptor/scaffold
Yes	P07947	Y425	R.LIEDNEY#TAR@.Q	0.8	Protein kinase, tyrosine (non-receptor)
Yes	P07947	Y425	R.LIEDNEY#TAR.Q	0.8	Protein kinase, tyrosine (non-receptor)
					continued on next page
Supplemental Table 2 (continued). Tyrosine phosphorylated peptides identified in the comparison of CA-CSF-1R to CA-CSF-1R Y561F MCF-10A cells.
Protein Name	UniProt #	NCBI Site	Peptide Sequence	FC(CA-CSF-1R/Y561F)	Function
CSF-1R	P07333	Y923	R.RERDY#TNLPSSSR.S	0.8	Receptor tyrosine kinase
Cdc2	P06493	Y15	K.IGEGT#Y#GVVYKGR.H	0.79	Protein kinase, Ser/Thr (non-receptor)
Cofilin	P23528	Y139	K.LTGIKHELQANCY#EEVKDR.C	0.79	Cytoskeletal protein
Crk	P46108	Y221	K.YRPASASVSALIGGNQEGSHPQPLGGPEPGPY#AQPSVNTPLPNLQNGPIYAR.V	0.77	Adapt / Scaffold
STAT3	P40763	Y705	K.YCRPESQEHPEADPGSAAPY#LK.T	0.77	Nuclear receptor co-regulator
STAT3	P40763	Y705	K.YCR@PESQEHPEADPGSAAPY#LK^.T	0.77	Nuclear receptor co-regulator
Insulin Receptor	P06213	Y1185, Y1189	R.DIY#ETDY#YR@.K	0.77	Receptor tyrosine kinase
Insulin Receptor	P06213	Y1185, Y1189	R.DIY#ETDY#YR.K	0.77	Receptor tyrosine kinase
CSF-1R	P07333	Y699	R.RKAEAMLGPSLSPGQDPEGGVDY#K.N	0.76	Receptor tyrosine kinase
PIN4	Q9Y237	Y122	K.FGY#HIIMVEGR.K	0.75	Enzyme, misc.
Plakophilin 3	Q9Y446	Y176	R.ADY#DTLSLR.S	0.74	Adhesion
EphA2	P29317	Y594	K.TYVDPHTY#EDPNQAVLK^.F	0.74	Receptor tyrosine kinase
EphA2	P29317	Y594	K.TYVDPHTY#EDPNQAVLK.F	0.74	Receptor tyrosine kinase
CSF-1R	P07333	Y699	R.KAEAMLGPSLSPGQDPEGGVDY#K.N	0.74	Receptor tyrosine kinase
RPS10	P46783	Y12	R.IAIY#ELLFK^.E	0.74	Translation
RPS10	P46783	Y12	R.IAIY#ELLFK.E	0.74	Translation
STAT3 iso2	P40763-2	Y704	K.YCR@PESQEHPEADPGAAPY#LK^.T	0.73	Nuclear rec co-regulator, Transcription factor
Insulin Receptor	P06213	Y1189	R.DIYETDY#YRK.G	0.73	Receptor tyrosine kinase
CSF-1R	P07333	Y699	R.KAEAMLGPSLSPGQDPEGGVDY#KNIHLEK.K	0.73	Receptor tyrosine kinase
STAT3 iso2	P40763-2	Y704	K.YCRPESQEHPEADPGAAPY#LK.T	0.72	Nuclear rec co-regulator, Transcription factor
STAT3 iso2	P40763-2	Y704	K.YCR@PESQEHPEADPGAAPY#LK^.T	0.72	Nuclear rec co-regulator, Transcription factor
p130Cas	P56945	Y387	R.RPGPGTLY#DVPR.E	0.71	Adaptor/scaffold
p130Cas	P56945	Y387	R.R@PGPGTLY#DVPR@.E	0.71	Adaptor/scaffold
p130Cas	P56945	Y128	K.AQQGLY#QVPGPSPQFQSPPAK^.Q	0.71	Adaptor/scaffold
p130Cas	P56945	Y128	K.AQQGLY#QVPGPSPQFQSPPAK.Q	0.71	Adaptor/scaffold
KIAA1217	Q5T5P2	Y244	R.NVY#YELNDVR@.N	0.7	Unknown function
KIAA1217	Q5T5P2	Y244	R.NVY#YELNDVR.N	0.7	Unknown function
Caveolin 1	Q03135	Y25	K.YVDSEGHLYTVPIREQGNIY#KPNNK.A	0.69	Adaptor/scaffold
Annexin A2	P07355	Y29	K.AY#TNFDAERDALNIETAIK.T	0.69	Lipid binding protein
Annexin A2	P07355	Y29	K.AY#TNFDAER@DALNIETAIK^.T	0.69	Lipid binding protein
Vimentin	P08670	Y53	R.SLY#ASSPGGVYATR.S	0.68	Cytoskeletal protein
PIN4	Q9Y237	Y122	K.FGY#HIIMVEGR@.K	0.68	Enzyme, misc.
PIN4	Q9Y237	Y122	K.FGY#HIIMVEGR.K	0.68	Enzyme, misc.
PIK3R1	P27986	Y467	K.SREYDRLY#EEYTR.T	0.68	Kinase, lipid
TYK2	P29597	Y292	R.LLAQAEGEPCY#IR.D	0.68	Protein kinase, tyrosine (non-receptor)
CSF-1R	P07333	Y699	R.RKAEAMLGPSLSPGQDPEGGVDY#K.N	0.68	Receptor tyrosine kinase
Pyk2	Q14289	Y579, Y580	R.YIEDEDY#Y#KASVTRLPIK.W	0.67	Protein kinase, tyrosine (non-receptor)
CDC2	P06493	T14 Y15	K.IEKIGEGT#Y#GVVYK.G	0.67	Protein kinase, Ser/Thr (non-receptor)
Caveolin	Q03135	Y14	K.YVDSEGHLY#TVPIREQGNIYKPNNK.A	0.67	Adaptor/scaffold
STEAP1	Q9UHE8	Y27	R.RNLEEDDY#LHKDTGETSMLK.R	0.66	Unknown function
CSF-1R	P07333	Y699	R.KAEAMLGPSLSPGQDPEGGVDY#K.N	0.66	Receptor tyrosine kinase
CSF-1R	P07333	Y699	R.K^AEAMLGPSLSPGQDPEGGVDY#K^.N	0.66	Receptor tyrosine kinase
CSF-1R	P07333	Y699	R.K^AEAMLGPSLSPGQDPEGGVDY#K^.N	0.66	Receptor tyrosine kinase
RPS27	P42677	Y31	R.LVQSPNSY#FMDVK^.C	0.66	Translation
RPS27	P42677	Y31	R.LVQSPNSY#FMDVK.C	0.66	Translation
PKC, Delta	Q05655	Y374	K.GRGEY#FAIK.A	0.65	Protein kinase, Ser/Thr (non-receptor)
eEF1A-2	Q05639	Y29	K.STTTGHLIY#K^.C	0.65	Translation
eEF1A-2	Q05639	Y29	K.STTTGHLIY#K.C	0.65	Translation
PIK3R1	P27986	Y467	R.EYDRLY#EEYTR.T	0.64	Kinase, lipid
PIK3R1	P27986	Y467	R.EYDR@LY#EEYTR@.T	0.64	Kinase, lipid
KRT81	Q14533	Y282	K.AQY#DDIVTR.S	0.64	Cytoskeletal protein
CSF-1R	P07333	Y923	R.ERDY#TNLPSSSR.S	0.63	Receptor tyrosine kinase
SHC 1	P29353	Y350	R.MAGFDGSAWDEEEEEPPDHQYY#NDFPGK^EPPLGGVVDMR@.L	0.62	Adaptor/scaffold
PZR	O95297	Y263	K.INKSESVVY#ADIR.K	0.62	Adaptor/scaffold
PZR	O95297	Y263	K.INK^SESVVY#ADIR@.K	0.62	Adaptor/scaffold
NHP2L1	P55769	Y31	K.LLDLVQQSCNY#K.Q	0.62	RNA binding protein
NDUFB10	O96000	Y54	K.NRY#YYYHR.Q	0.62	Oxidoreductase
CSF-1R	P07333	Y699	R.KAEAM*LGPSLSPGQDPEGGVDY#K.N	0.62	Receptor tyrosine kinase
EphA2	P29317	Y588, Y594	K.TY#VDPHTY#EDPNQAVLK^.F	0.62	Receptor tyrosine kinase
EphA2	P29317	Y588, Y594	K.TY#VDPHTY#EDPNQAVLK.F	0.62	Receptor tyrosine kinase
Vimentin	P08670	Y61	R.SLYASSPGGVY#ATR.S	0.61	Cytoskeletal protein
PGK1	P00558	Y196	K.ELNY#FAK.A	0.61	Enzyme, cellular metabolism
Cdc2	P06493	Y15	K.IEKIGEGT#Y#GVVYK.G	0.61	Protein kinase, Ser/Thr (non-receptor)
CDK3	Q00526	T14 Y15	K.IGEGT#Y#GVVYK^.A	0.61	Protein kinase, Ser/Thr (non-receptor)
CDK3	Q00526	T14 Y15	K.IGEGT#Y#GVVYK.A	0.61	Protein kinase, Ser/Thr (non-receptor)
PZR	O95297	Y263	K.SESVVY#ADIR@.K	0.6	Adaptor/scaffold
PZR	O95297	Y263	K.SESVVY#ADIR.K	0.6	Adaptor/scaffold
LDH-A	P00338	Y238	K.QVVESAY#EVIK^.L	0.6	Enzyme, cellular metabolism
LDH-A	P00338	Y238	K.QVVESAY#EVIK.L	0.6	Enzyme, cellular metabolism
EGF-R	P00533	Y1197	K.GSTAENAEY#LR.V	0.6	Receptor tyrosine kinase
VASP	P50552	Y38	R.VQIY#HNPTANSFR.V	0.59	Cytoskeletal protein
DLG1	Q12959	Y760	K.RDYEVDGRDY#HFVTSR.E	0.59	Adaptor/scaffold
DLG3	Q92796	Y673	R.RDNEVDGQDY#HFVVSR.E	0.59	Adaptor/scaffold
DLG3	Q92796	Y673	R.R@DNEVDGQDY#HFVVSR@.E	0.59	Adaptor/scaffold
CDC2	P06493	T14 Y15	K.IGEGT#Y#GVVYKGR.H	0.58	Protein kinase, Ser/Thr (non-receptor)
PIK3R1	P27986	Y580	R.DQY#LM*WLTQK^.G	0.57	Kinase, lipid
PIK3R1	P27986	Y580	R.DQY#LM*WLTQK.G	0.57	Kinase, lipid
PIK3R1	P27986	Y580	K.TRDQY#LM*WLTQK.G	0.57	Kinase, lipid
Caveolin 1	Q03135	Y14	K.YVDSEGHLY#TVPIR.E	0.57	Adaptor/scaffold
SLC38A2	Q9HAV3	Y41	K.SHY#ADVDPENQNFLLESNLGK.K	0.56	Transporter
					continued on next page
Supplemental Table 2 (continued). Tyrosine phosphorylated peptides identified in the comparison of CA-CSF-1R to CA-CSF-1R Y561F MCF-10A cells.
Protein Name	UniProt #	NCBI Site	Peptide Sequence	FC(CA-CSF-1R/Y561F)	Function
SLC38A2	Q9HAV3	Y41	K.SHY#ADVDPENQNFLLESNLGK^.K	0.56	Transporter
PIK3R1	P27986	Y580	K.TRDQY#LMWLTQK.G	0.56	Kinase, lipid
PIK3R1	P27986	Y580	K.TR@DQY#LMWLTQK^.G	0.56	Kinase, lipid
CSF-1R	P07333	Y699	K.AEAMLGPSLSPGQDPEGGVDY#K^.N	0.56	Receptor tyrosine kinase
CSF-1R	P07333	Y699	K.AEAMLGPSLSPGQDPEGGVDY#K.N	0.56	Receptor tyrosine kinase
Annexin A2	P07355	Y23	K.LSLEGDHSTPPSAY#GSVK.A	0.56	Lipid binding protein
Annexin A2	P07355	Y23	K.LSLEGDHSTPPSAY#GSVK.A	0.56	Lipid binding protein
Annexin A2	P07355	Y23	K.LSLEGDHSTPPSAY#GSVK^.A	0.56	Lipid binding protein
Annexin A2	P07355	Y23	K.LSLEGDHSTPPSAYGS#VK^.A	0.56	Lipid binding protein
Cdc2	P06493	Y15	K.IEK^IGEGTY#GVVYK^.G	0.55	Protein kinase, Ser/Thr (non-receptor)
Cdc2	P06493	Y15	K.IEKIGEGTY#GVVYK.G	0.55	Protein kinase, Ser/Thr (non-receptor)
Cdc2	P06493	Y15	K.IEKIGEGTY#GVVYK.G	0.55	Protein kinase, Ser/Thr (non-receptor)
Annexin A2	P07355	Y23	K.LSLEGDHSTPPS#AYGSVK^.A	0.55	Lipid binding protein
Annexin A2	P07355	Y23	K.LSLEGDHSTPPSAYGS#VK.A	0.55	Lipid binding protein
PIK3R1	P27986	Y580	K.TRDQY#LMWLTQK.G	0.54	Kinase, lipid
PIK3R1	P27986	Y580	K.TR@DQY#LMWLTQK^.G	0.54	Kinase, lipid
PTRF	Q6NZI2	Y156	K.VMIY#QDEVKLPAK.L	0.54	Transcription initiation complex
PTRF	Q6NZI2	Y156	K.VMIY#QDEVK^LPAK^.L	0.54	Transcription initiation complex
Enolase 1	P06733	Y188	R.IGAEVY#HNLK^.N	0.54	Enzyme, cellular metabolism
H2B1L	Q99880	Y42	K.ESYSVYVY#K^.V	0.53	DNA binding protein
H2B1L	Q99880	Y42	K.ESYSVYVY#K.V	0.53	DNA binding protein
ZDHHC5	Q9C0B5	S529 Y533	R.LVPTGPTHREPS#PVRY#DNLSR.H	0.53	Unknown function
ERK2	P28482	Y186	R.VADPDHDHTGFLTEY#VATR@.W	0.53	Protein kinase, Ser/Thr (non-receptor)
ERK2	P28482	Y186	R.VADPDHDHTGFLTEY#VATR.W	0.53	Protein kinase, Ser/Thr (non-receptor)
CDK3	Q00526	Y15	K.IGEGTY#GVVYK^.A	0.53	Protein kinase, Ser/Thr (non-receptor)
CDK3	Q00526	Y15	K.IGEGTY#GVVYK.A	0.53	Protein kinase, Ser/Thr (non-receptor)
Caveolin 1	Q03135	Y14	K.YVDSEGHLY#TVPIR.E	0.53	Adaptor/scaffold
Annexin A2	P07355	Y237	K.SYSPY#DMLESIRK.E	0.53	Lipid binding protein
Annexin A2	P07355	Y237	K.SYSPY#DMLESIR@K^.E	0.53	Lipid binding protein
CDK3	Q00526	Y19	K.IGEGTYGVVY#K^.A	0.52	Protein kinase, Ser/Thr (non-receptor)
CDK3	Q00526	Y19	K.IGEGTYGVVY#K.A	0.52	Protein kinase, Ser/Thr (non-receptor)
PIK3R1	P27986	Y580	K.TRDQY#LM*WLTQK.G	0.52	Kinase, lipid
ERK1	P27361	Y204	R.IADPEHDHTGFLTEY#VATR.W	0.52	Protein kinase, Ser/Thr (non-receptor)
Annexin A2	P07355	Y315	K.SLY#YYIQQDTK^.G	0.52	Lipid binding protein
Annexin A2	P07355	Y315	K.SLY#YYIQQDTK.G	0.52	Lipid binding protein
SHC 1	P29353	Y427	R.ELFDDPSY#VNVQNLDK^.A	0.51	Adaptor/scaffold
PIK3R1	P27986	Y580	R.DQY#LMWLTQK^.G	0.51	Kinase, lipid
PIK3R1	P27986	Y580	R.DQY#LMWLTQK.G	0.51	Kinase, lipid
FAM62A	Q9BSJ8	Y822	K.HLSPY#ATLTVGDSSHK.T	0.51	Unknown function
DLG1	Q12959	Y760	R.DYEVDGRDY#HFVTSR.E	0.51	Adaptor/scaffold
p120 Catenin	O60716	Y96	K.LNGPQDHSHLLY#STIPR.M	0.5	Adaptor/scaffold, Adhesion
UrdPase 1	Q16831	Y35	K.MKEDILY#HFNLTTSR.H	0.49	Transferase
PDLIM5	Q96HC4	Y251	R.YTEFY#HVPTHSDASK.K	0.49	Adaptor/scaffold
Cdc2	P06493	Y15	K.IEKIGEGTY#GVVYK.G	0.49	Protein kinase, Ser/Thr (non-receptor)
Cdc2	P06493	Y15	K.IEK^IGEGTY#GVVYK^.G	0.49	Protein kinase, Ser/Thr (non-receptor)
CNP	P09543	Y110	K.RLDEDLAAY#CR.R	0.48	Hydrolase
CNP	P09543	Y110	K.R@LDEDLAAY#CR@.R	0.48	Hydrolase
ERK2	P28482	Y186	R.VADPDHDHTGFLTEY#VATR.W	0.47	Protein kinase, Ser/Thr (non-receptor)
Annexin A2	P07355	Y237	K.SYSPY#DMLESIR.K	0.47	Lipid binding protein
PI3K p110 alpha	P42336	Y508	R.EAGFSY#SHAGLSNR.L	0.45	Kinase, lipid
ARP2/3 Sub 3	O15145	Y46	K.DTDIVDEAIY#YFK.A	0.44	Cytoskeletal protein
CNP	P09543	Y110	R.LDEDLAAY#CR.R	0.44	Hydrolase
Plakophilin 3	Q9Y446	Y84	R.GQY#HTLQAGFSSR@.S	0.43	Adhesion
Plakophilin 3	Q9Y446	Y84	R.GQY#HTLQAGFSSR.S	0.43	Adhesion
H2B1L	Q99880	Y40	K.ESYSVY#VYK.V	0.43	DNA binding protein
H2B2E	Q16778	Y43	K.ESYSIYVY#K.V	0.43	DNA binding protein
CDK3	Q00526	Y15	K.VEKIGEGTY#GVVYK.A	0.43	Protein kinase, Ser/Thr (non-receptor)
Plakophilin 3	Q9Y446	Y84	R.GQY#HTLQAGFSSR.S	0.42	Adhesion
Plakophilin 3	Q9Y446	Y84	R.GQY#HTLQAGFSSR@.S	0.42	Adhesion
H2B2E	Q16778	Y43	R.KESYSIYVY#K.V	0.42	DNA binding protein
H2B2E	Q16778	Y43	R.K^ESYSIYVY#K^.V	0.42	DNA binding protein
H2B1L	Q99880	Y42	R.KESYSVYVY#K.V	0.42	DNA binding protein
H2B1L	Q99880	Y42	R.K^ESYSVYVY#K^.V	0.42	DNA binding protein
EGF-R	P00533	Y1172	K.GSHQISLDNPDY#QQDFFPK^.E	0.42	Receptor tyrosine kinase
EGF-R	P00533	Y1172	K.GSHQISLDNPDY#QQDFFPK.E	0.42	Receptor tyrosine kinase
Annexin A1	P04083	Y38	K.GGPGSAVSPY#PTFNPSSDVAALHK^.A	0.42	Calcium-binding protein
Annexin A1	P04083	Y38	K.GGPGSAVSPY#PTFNPSSDVAALHK.A	0.42	Calcium-binding protein
PTRF	Q6NZI2	Y308	R.KSFTPDHVVY#AR.S	0.35	Transcription initiation complex
PTRF	Q6NZI2	Y308	R.K^SFTPDHVVY#AR@.S	0.35	Transcription initiation complex
PTRF	Q6NZI2	Y308	R.K^SFTPDHVVY#AR@.S	0.34	Transcription initiation complex
GAB1	Q13480	Y659	K.SSGSGSSVADERVDY#VVVDQQK.T	0.31	Adaptor/scaffold
ERK2	P28482	T184, Y186	R.VADPDHDHTGFLT#EY#VATR@.W	0.31	Protein kinase, Ser/Thr (non-receptor)
ERK2	P28482	T184, Y186	R.VADPDHDHTGFLT#EY#VATR.W	0.31	Protein kinase, Ser/Thr (non-receptor)
PTRF	Q6NZI2	Y308	K.SFTPDHVVY#AR@.S	0.28	Transcription initiation complex
PTRF	Q6NZI2	Y308	K.SFTPDHVVY#AR.S	0.28	Transcription initiation complex
HGK	O95819	Y1227	R.SGGSSQVY#FMTLGR@.T	0.28	Protein kinase, Ser/Thr (non-receptor)
HGK	O95819	Y1227	R.SGGSSQVY#FMTLGR.T	0.28	Protein kinase, Ser/Thr (non-receptor)
GAB1	Q13480	Y406	K.DASSQDCY#DIPR.A	0.27	Adaptor/scaffold
SLC20A1	Q8WUM9	Y388	K.DSGLY#KELLHK.L	0.25	Transporter
SgK269	Q9H792	Y635	K.NAIK^VPIVINPNAY#DNLAIYK^.S	0.25	Protein kinase, Ser/Thr (non-receptor)
					continued on next page
Supplemental Table 2 (continued). Tyrosine phosphorylated peptides identified in the comparison of CA-CSF-1R to CA-CSF-1R Y561F MCF-10A cells.
Protein Name	UniProt #	NCBI Site	Peptide Sequence	FC(CA-CSF-1R/Y561F)	Function
MGC32065	Q8WV41	Y264	K.LTPTHAASPVY#R.R	0.22	Unknown function
Cdk3	Q00526	Y15	K.VEKIGEGTY#GVVYK.A	0.21	Protein kinase, Ser/Thr (non-receptor)
Cdk3	Q00526	Y15	K.VEK^IGEGTY#GVVYK^.A	0.21	Protein kinase, Ser/Thr (non-receptor)
SgK269	Q9H792	Y635	K.NAIKVPIVINPNAY#DNLAIYK.S	<0.054	Protein kinase, Ser/Thr (non-receptor)
# indicates phosphorylation
* indicates oxidation
@ indicates "heavy" arginine
^ indicates "heavy" lysine
